# Supplementary material for: Strong metal–support interactions enable highly transparent Pt–Mo2C counter electrodes of bifacial dye-sensitized solar cells
Source: Royal Society of Chemistry journal article supplement (doi:10.1039/d0cc03744c), 2020-01-01
Supplement: d0cc03744c1.pdf [file d0cc03744c1.pdf]

## Electronic Supplementary Information

### **Strong metal-support interactions enable highly transparent Pt-Mo<sub>2</sub>C counter electrodes of bifacial dye-sensitized solar cells**

*Chunxia Wu,<sup>a</sup> Rong Li,<sup>a</sup> Yinglin Wang,<sup>\*a</sup> Shuang Lu,<sup>a</sup> Jun Lin,<sup>a</sup> Yichun Liu,<sup>a</sup> and Xintong Zhang<sup>\*a</sup>*

<sup>a</sup>Center for Advanced Optoelectronic Functional Materials Research, and Key Lab of UV-Emitting Materials and Technology of Ministry of Education, Northeast Normal University, 5268 Renmin Street, Changchun 130024, China

E-mail: wangyl100@nenu.edu.cn; xtzhang@nenu.edu.cn

## Experiment

**Preparation of counter electrodes:** An Mo<sub>2</sub>C film was deposited on well-cleaned fluorine-doped tin oxide (FTO) by radio frequency magnetron sputtering. The Mo<sub>2</sub>C target (99.9%) was pre-sputtered for 10 min to remove impurities. All of the samples were deposited for 3 min under an Ar atmosphere with a sputtering pressure of 0.8 Pa. The deposition power was maintained at 60 W, and the substrate temperature was 200°C. We then impregnated the sputtered Mo<sub>2</sub>C substrates in a chloroplatinic acid/isopropyl alcohol solvent with various concentrations. Finally, the samples were placed in a rapid annealing furnace and annealed at 450°C for 15 min. For comparison, we impregnated FTO into a chloroplatinic acid solution annealed at 450°C for 15 min, which was named IM-Pt. The Mo<sub>2</sub>C annealed at 450°C for 15 min was named HT-Mo<sub>2</sub>C. HT-Pt was prepared by high-temperature pyrolysis.

**Fabrication of DSCs:** The cleaned FTO was pre-treated with a TiCl<sub>4</sub> aqueous solution (40 mM) in an oven at 70°C for 35 min. TiO<sub>2</sub> layers with thicknesses of approximately 11 μm were prepared by screen printing. The TiO<sub>2</sub> layers were sintered at 500°C for 30 min. After the samples were post-treated with a TiCl<sub>4</sub> solution for 20 min and sintered at 500°C, the electrodes were impregnated in an N719 ethanol solution (0.3 mM) for 24 h at room temperature.

**Characterization:** The morphologies were detected utilizing FEI Quanta 250 field-emission scanning electron microscopy (SEM) and FEI F200talos TEM. The roughness and conductivity of Mo<sub>2</sub>C, HT-Mo<sub>2</sub>C and HT-Pt were measured by atomic force microscopy (AFM) on a Multimode8 instrument (Bruker). We use a Rigaku, D/max-2500 X-ray diffractometer (XRD) with Cu Kα radiation ( $\lambda = 1.542 \text{ \AA}$ ) operated at 40 kV and 100 mA to certify the crystal structure of molybdenum carbide. The optic transmittance was obtained on a UV-vis spectrophotometer at 400nm-900nm. The electrochemical characterizations such as Tafel polarization, electrochemical impedance spectroscopy (EIS) were tested employing a ModuLab XM Photoelectrochemical Test System. The voltage range of Tafel polarization test is -1V-1V, and the forward bias of EIS is 0.4V. The photovoltaic properties of cells were measured by a Keithley 2400 source meter from front side and rear side

irradiation under AM 1.5G simulated solar light (ABET Technology, 100 mW cm<sup>-2</sup>). And the simulation of indoor light is achieved by a GCI-0604 LED from Daheng Optics.

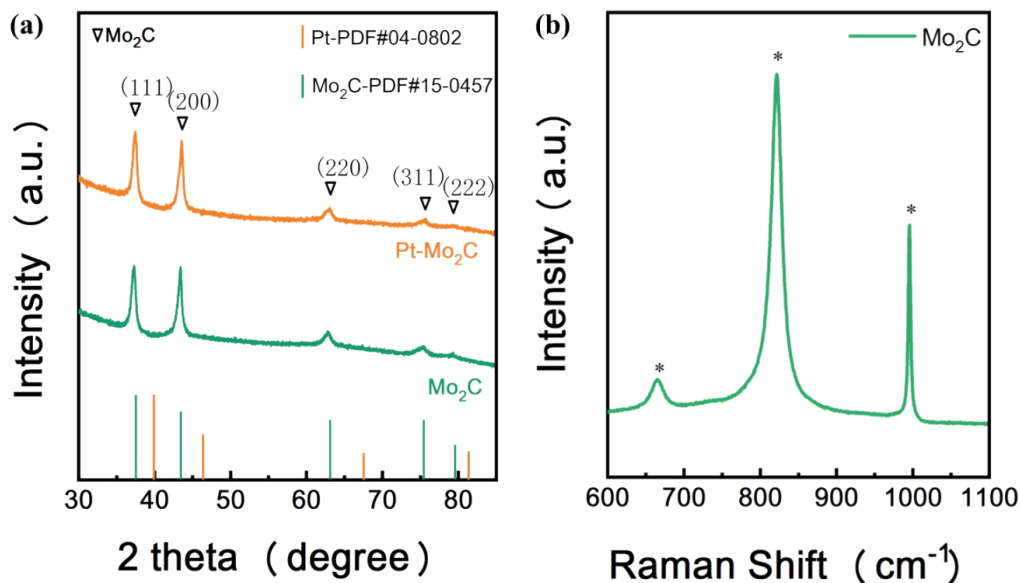

Fig. S1 (a) XRD patterns of Mo<sub>2</sub>C and Pt-Mo<sub>2</sub>C. (b) Raman spectroscopy of Mo<sub>2</sub>C

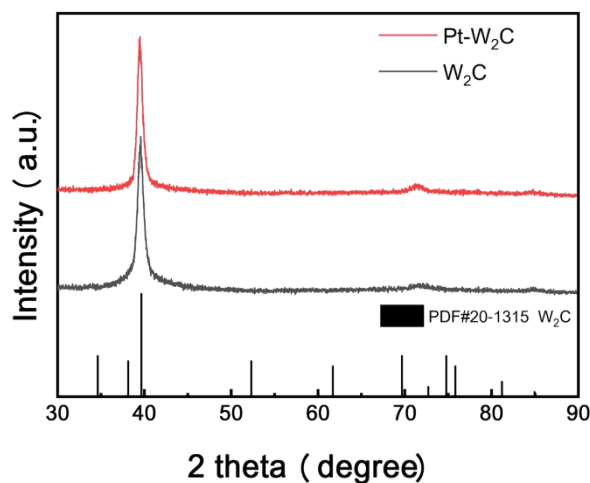

Fig. S2 XRD patterns of W<sub>2</sub>C and Pt-W<sub>2</sub>C.

The Raman results showed clear peaks at 666, 822, 996 cm<sup>-1</sup>, confirming the formation of Mo<sub>2</sub>C. The X-ray diffraction result displayed characteristic planes of (1 1 1), (2 0 0), (2 2 0), (3 1 1), and (2 2 2) for cubic Mo<sub>2</sub>C (PDF#15-0457). The deposition of Pt clusters showed no evident influence on the crystallization of the Mo<sub>2</sub>C supports. We observed no diffraction peaks of Pt on the Pt-Mo<sub>2</sub>C CEs, which was likely due to the low loading and the small sizes of the Pt clusters.

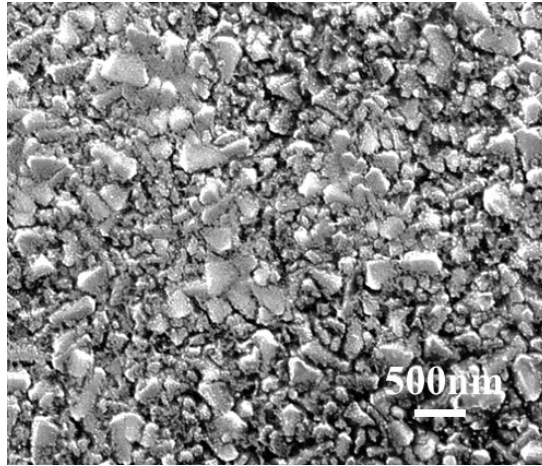

Fig. S3 Top SEM images of HT-Pt

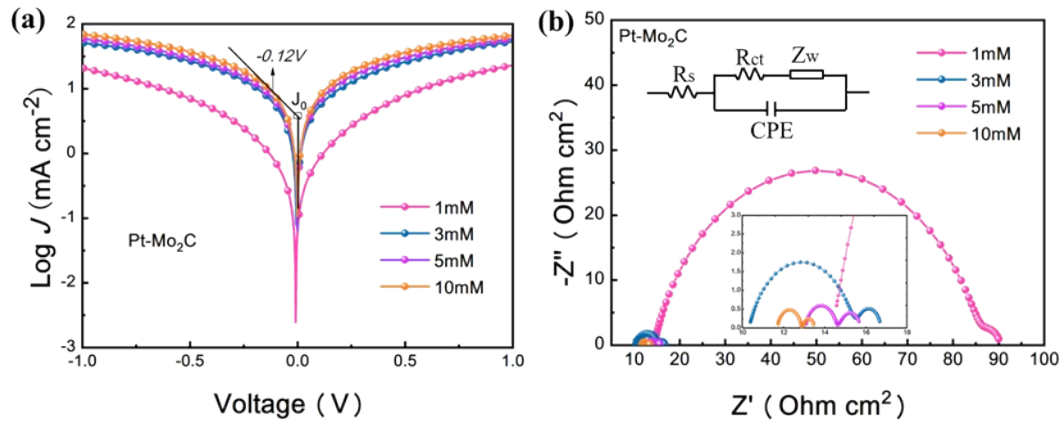

Fig. S4 (a) Tafel polarization curves and (b) Nyquist plots of different concentrations of chloroplatinic acid. Both experiments were performed with the symmetrical dummy cells with two identical electrodes (CE//iodide/triiodides electrolyte//CE). The inset (b) shows the equivalent circuit model of the symmetrical cells for fitting EIS results.

Table S1 Electrochemical properties from dummy cell with various concentrations of Chloroplatinic acid

| Resistance                         | 1mM   | 3mM   | 5mM   | 10mM  |
|------------------------------------|-------|-------|-------|-------|
| $R_s$ ( $\Omega \text{ cm}^2$ )    | 12.97 | 12.42 | 12.24 | 11.71 |
| $R_{ct}$ ( $\Omega \text{ cm}^2$ ) | 39.41 | 22.94 | 7.89  | 1.08  |

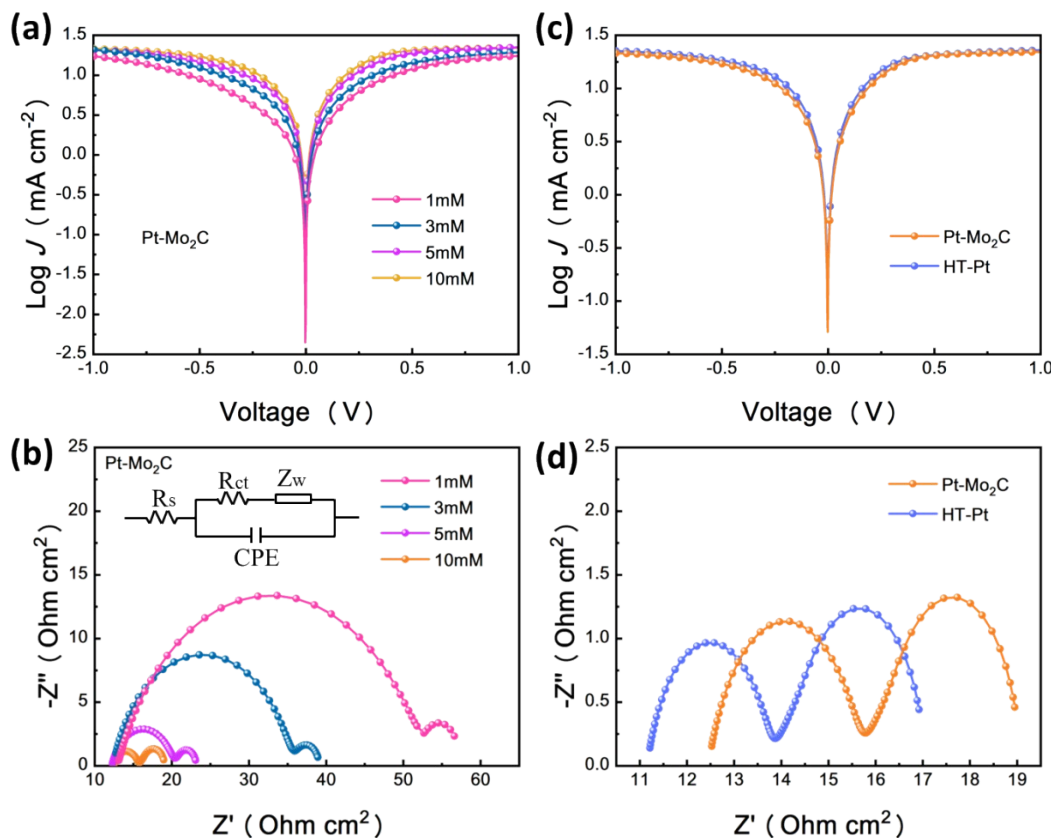

Fig. S5 (a) Tafel polarization curves and (b) Nyquist plots of different concentrations of chloroplatinic acid. (c) Tafel polarization curves and (b) Nyquist of (c-d) HT-Pt and Pt-Mo<sub>2</sub>C. Both experiments were performed with the symmetrical dummy cells with two identical electrodes (CE//Co<sup>2+</sup>/Co<sup>3+</sup> electrolyte//CE). The inset (b) shows the equivalent circuit model of the symmetrical cells for fitting EIS results.

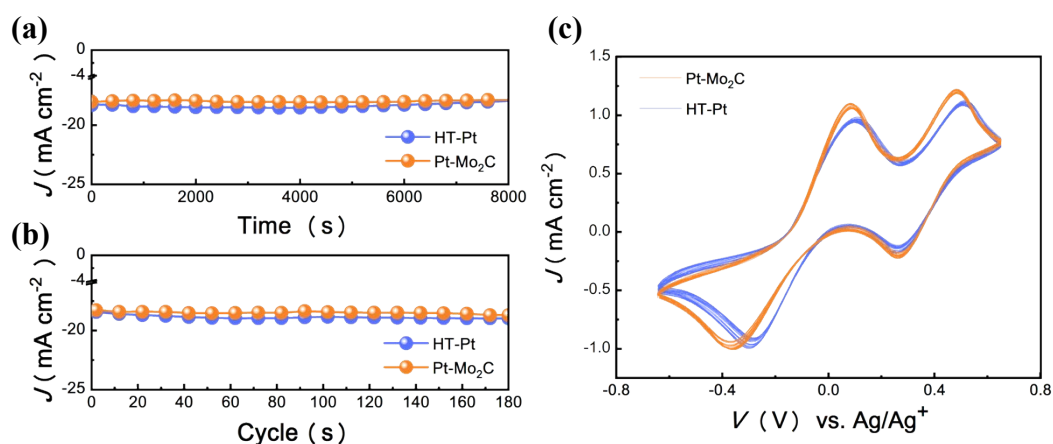

Fig. S6 (a) Current density vs time plots under bias voltages of -0.25 V, (b) extracted current density at -0.25 V from multi-cycle Tafel tests (180 cycles), and (c) successive CV (30 cycles) results of Pt-Mo<sub>2</sub>C and HT-Pt.

Table S2 Summary of  $J$  of I-t and successive CV

|                      | I-t                                   |                                   |               | CV                                    |                                   |               |
|----------------------|---------------------------------------|-----------------------------------|---------------|---------------------------------------|-----------------------------------|---------------|
|                      | Initial $J$<br>(mA cm <sup>-2</sup> ) | End $J$<br>(mA cm <sup>-2</sup> ) | E $J$ / I $J$ | Initial $J$<br>(mA cm <sup>-2</sup> ) | End $J$<br>(mA cm <sup>-2</sup> ) | E $J$ / I $J$ |
| HT-Pt                | 18.30                                 | 17.95                             | 98%           | -1.00                                 | -0.91                             | 91%           |
| Pt-Mo <sub>2</sub> C | 18.00                                 | 17.85                             | 99%           | -1.01                                 | -0.94                             | 93%           |

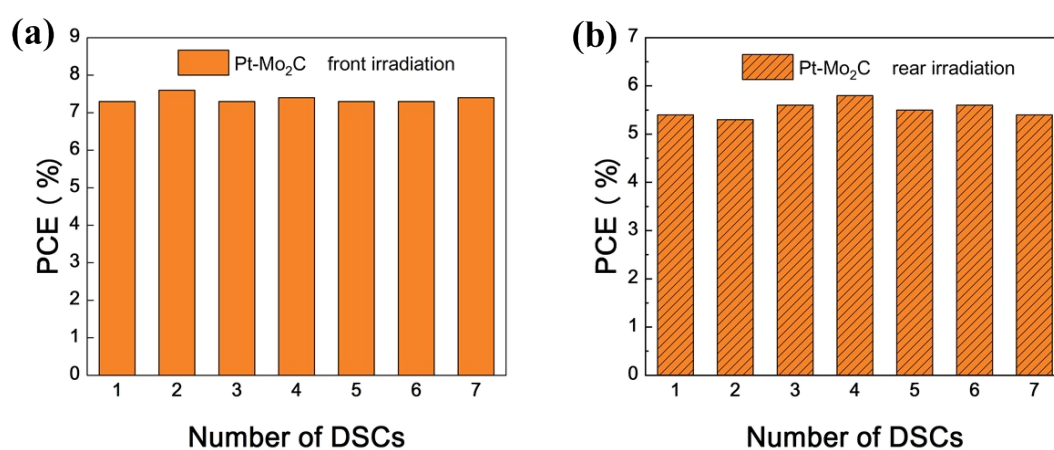

Fig. S7 Histogram of PCE for Pt-Mo<sub>2</sub>C as CE in DSSCs (a) front irradiation (b) rear irradiation.
